1 **Title:**

2 Domain specific need assessment for Hospital Disaster Preparedness: a systematic review and  
3 critical interpretative synthesis

4 **Short title:** Need assessment for Hospital Disaster Preparedness

5 **Authors:**

6 Neeraj Pawar<sup>1¶\*</sup>, Raghvendra Gumashta<sup>1¶</sup>, Girjesh Gupta<sup>1&</sup>, Rajendra Mahore<sup>1&</sup>, Jyotsna  
7 Gumashta<sup>2&</sup>

8  
9 <sup>1</sup> Department of Community Medicine, Peoples College of Medical Sciences Bhopal, M.P.  
10 India

11 <sup>2</sup> Department of Physiology, AIIMS Nagpur, Maharashtra

12

13

14

15 **\*Corresponding author**

16 **Email:** [neerajpawar160@gmail.com](mailto:neerajpawar160@gmail.com)

17 ¶ These authors contributed equally to this work

18 & These authors also contributed equally to this work.

19

20 **Abstract:**

21 Background: During disasters, the most pressing demands are those related to health, and  
22 hospital preparedness is an area that requires special attention. Hospitals are viewed as resources  
23 that must be proactively utilized in the event of a disaster. If national and local systems,  
24 particularly health systems, are unprepared to deal with disasters, the vulnerability of both  
25 individuals and communities is amplified. The unexpected surge in demand for important  
26 health services caused by disasters frequently overwhelms health systems and institutions,  
27 leaving them unable to perform the life-saving measures that are required. This study aims to

28 understand various domains of hospital disaster preparedness by critically synthesizing  
29 qualitative evidence from selected research on the topic.

30 Methods: Electronic data base from PubMed, Google Scholar, key hospital disaster related  
31 journals was explored with search syntax focusing on hospital related disaster preparedness.  
32 Peer reviewed English articles published from January 2011 were systematically selected and  
33 critical interpretative qualitative synthesis was done to have comprehensive understanding of  
34 the said phenomenon.

35 Results: A total of 29 articles were included in the systematic review. Major resultant domains  
36 describing disaster preparedness were Human Resource, Logistics And Finance, Response,  
37 Communication, Coordination, Patient Care, Evacuation and Personal Protection. Some  
38 domains were more emphasised than others, this information can help prioritizing the action  
39 based on need especially in the times of disaster.

40 Conclusion: Disaster preparedness needs a comprehensive approach including context specific  
41 optimization with the effective use of available resources.

42 *Key words: Disaster, Hospital Preparedness, Systematic Review, Critical Interpretative*  
43 *Synthesis*

#### 44 **1. Introduction:**

45 Disaster is defined as an incident or condition that exceeds the local community's ability to  
46 manage the impact. It is a major deterioration of society's function at any degree posed by  
47 hazardous occurrences combined with situations of exposure, vulnerability, and capacity,  
48 resulting in one or more of the following losses and impacts: human, material, financial, and  
49 environmental. Natural disasters have wreaked havoc throughout history. The disaster's impact  
50 can be rapid and confined, but it's usually extensive and can persist for a long time. The effect

51 may put a community's or society's ability to cope with its resources to the test, necessitating  
52 aid from other sources, such as national or international levels. (1)

53 As one of the most significant healthcare institutions, hospitals play a critical role in providing  
54 services in both routine and disaster-struck situations. (2–4) Hospitals are considered safe and  
55 sophisticated places for patient care and must ideally be sufficiently equipped to respond to a  
56 variety of foreseeable and unpredictable incidents. (5–7) Despite their reputation, hospitals are  
57 vulnerable to both internal and external calamities. (8) Intrinsic disasters like biological  
58 emergencies, fire, earthquakes damage the hospital structure and function, compromising the  
59 delivery of essential care services and potentially posing threat to the health of hospital  
60 residents, including the staff, leading to the facility's entire evacuation. (4)

61 According to the World Health Organization (WHO), disaster preparedness includes  
62 identifying potential threats, building an inventory of existing assets, and establishing a  
63 capacity to respond to a health crisis. When it comes to hospital-specific emergency actions,  
64 the WHO defines disaster preparedness as an intersectoral collaborative effort to respond to,  
65 control, and recover from an imminent hazardous event. (9) The Sendai Framework provides  
66 more detailed definitions of disaster preparedness, including disaster drills and the  
67 establishment of support networks. (10)

68 Hospital-related disaster preparedness warrants a holistic approach with the inclusion of  
69 structural building plans that has provisions for fire safety, earthquake resilience, inbuilt  
70 management system, trained human resource, logistics, communication, and transport  
71 mechanisms. There is a spectrum of research published on hospital-related disasters, some are  
72 learning experiences from incident-specific hospital-related disasters, others include the impact  
73 of training, qualitative inquiry, meta-analysis, all discussing the key aspects of hospital-related  
74 disaster-specific preventions and interventions. (11–35) This brings a fragmented yet

75 comprehensive knowledge base on the various aspects of disaster preparedness. This study,  
76 therefore, aims to generate a qualitative pool of ideas from the existing body of literature, by  
77 observing and reporting the emphasized areas /domains in individual studies and  
78 contextualizing the evidence presented to have an overall understanding of the needs of hospital  
79 disaster preparedness and resilience.

## 80 **2. Methods:**

### 81 ***2.1 Adopting a novel approach :***

82 The current research conducted a systematic review with critical interpretive synthesis. This  
83 design is based on qualitative research processes incorporated in traditional systematic review  
84 methods, and it can be used to combine qualitative and quantitative evidence. It is mainly  
85 geared toward hypothesis generation with the provision of a recursive and adaptive approach  
86 to searching for literature and selecting materials for inclusion in reviews. It treats the literature  
87 as deserving of critical examination in and of itself by analysing its underlying assumptions;  
88 and achieves synthesis through a logical balance between evidence and theory. The emphasis  
89 is not only on the narrative context but also on the 'authorial voice' for evidence generation.  
90 (36)

### 91 ***2.2 Identifying relevant studies:***

92 The Preferred Reporting Items for Systematic Reviews and Meta-Analyses (PRISMA)  
93 standards were followed for conducting this review. (37) , see S1File, S2 File.

94 Figure 1 is a flow chart depicting the selection process. A search strategy was created based on  
95 the PRISMA protocol, and screening, study selection, quality evaluation, and data extraction  
96 were all completed.

97 Data sources used in this study included MEDLINE (PubMed), Google Scholar, key journals  
98 such as Disaster Medicine and Public Health Preparedness, BMC health services and research,

99 PLOS ONE, Journal of Education and Health Promotion, and reference lists of selected articles  
100 and systematic reviews. Keywords were selected, based on relevance to the study context,  
101 consultation with scientific experts, and terms used in the relevant literature as a guide.  
102 "Emergency Evacuation", "Urgent Evacuation", "Evacuation Time", "Patient Evacuation",  
103 "Medical Facility", "Health Center", "Healthcare Center", "Tertiary Referral Center", "Tertiary  
104 Care Center", "Hospital", "Disaster", "Event", "Incident", "Emergency", "Hazard", "Fire" were  
105 among the keywords used in this study. The initial search syntax was first developed for  
106 PubMed, employing operators, keywords, and search fields. Studies completed between  
107 January 2011 and December 2021, were included in the literature search. Table 1 shows the  
108 search method that was used.

109

---

110 **Table 1: Search strategy terms**

---

Plan OR Process OR Preparedness

**AND**

"Medical Facilit\*" OR "Healthcare facilit\*" OR "Health cente\*" OR "Healthcare Cente\*" OR "Tertiary Referral Cente\*" OR "Tertiary Care Cente\*" OR Hospital[tiab] OR "Health Facilit\*"

**AND**

Disaster\*[tiab] OR Event\* OR Incident\* OR Emerge\* OR Hazard\* OR Fire\*

---

Syntax :

(Plan OR Process OR Preparedness) AND ("Medical Facilit\*" OR "Healthcare facilit\*" OR "Health cente\*" OR "Healthcare Cente\*" OR "Tertiary Referral Cente\*" OR "Tertiary Care

---

---

Cente\*" OR Hospital[tiab] OR "Health Facilit\*") AND (Disaster\*[tiab] OR Event\* OR Incident\* OR Emerge\* OR Hazard\* OR Fire\*)

---

- Total results: 23031 results
  - 2011 onwards: 114999 results
  - English : 14798
  - Free full text: 7858 results (Title and abstract screened for eligibility)
  - 33 selected articles through screening title & abstract
  - 29 final selection via thorough screening of complete articles
- 

111

112 ***2.3 Study selection :***

113 After applying this search syntax, a total of 23241 records were obtained out of 7858 articles  
114 were selected for screening after applying relevant filters, like removal of duplicates, records  
115 in other languages, and records before 2011. Then in the next step, the titles and abstracts were  
116 screened for eligibility. (Figure 1) For evaluating the quality of papers, to be included, rather  
117 than focusing on specific study categories or publications that satisfied specific methodological  
118 standards, we attempted to prioritize studies that looked to be relevant. Two researchers worked  
119 independently on study screening and selection, as well as data extraction. We considered it  
120 was critical to use a low barrier for an interpretive review to maximize the inclusion and  
121 contribution of a wide range of papers at the concept level. As a result, we took a two-pronged  
122 approach to quality control. First, we opted to eliminate publications that were shown to be  
123 grossly inconsistent. Second, as we'll see later, once in the review, the synthesis itself required  
124 critical judgments and interpretations of acceptability and contribution. Therefore, appraisal  
125 prompts for informing judgments about the quality of papers were also used which included  
126 the following questions:

- 127 1. Are the research's goals and objectives described clearly?
- 128 2. Is the research methodology defined and relevant for the study's goals and objectives?
- 129 3. Do the researchers provide a detailed overview of how their findings were replicated?
- 130 4. Is there enough evidence to back up the researchers' interpretations and conclusions?
- 131 5. Is the analytical procedure appropriate and well-explained?

132 In the end, the review included a total of 29 papers.

133 **Figure 1: PRISMA flow diagram for new systematic reviews which included searches of**  
134 **databases**

#### 135 ***2.4 Summarizing the selected studies***

136 Based on the aforementioned criteria, two researchers (RG and NP) extracted the final study  
137 data separately. A summary of the selected studies, including the names of the initial authors,  
138 year, location, design, and the key findings are reflected in Table -2. Among the 29 selected  
139 studies, two were systematic reviews with meta-analyses, one was a qualitative study, rest were  
140 descriptive studies. (Table-2)

---

**Table 2 : Overview of studies included in the review after systematic selection and the extracted key words from the articles on the factors affecting disaster preparedness of in hospital setting**

---

| Codes | First Author<br>,Year | Place | Type | Method | Number of<br>Reference | The findings from the<br>articles |
|-------|-----------------------|-------|------|--------|------------------------|-----------------------------------|
|-------|-----------------------|-------|------|--------|------------------------|-----------------------------------|

---

|          |                       |           |                        |                     |     |                                                                                                                                                                                 |
|----------|-----------------------|-----------|------------------------|---------------------|-----|---------------------------------------------------------------------------------------------------------------------------------------------------------------------------------|
| <b>A</b> | Sellers (39),<br>2021 | Australia | Review<br>Article      | Concept<br>Analysis | 30* | Effective Utilization Of<br>Space, Increased<br>Demand Of Logistics,<br>Human Resource,<br>Training And Call Back<br>Mechanism                                                  |
| <b>B</b> | Sahebi (42),<br>2021  | Iran      | Original<br>Article    | Qualitative         | 56* | Response To The<br>Incident, Hospital<br>Preparedness, Moral And<br>Ethical Values, And<br>Human And<br>Environmental Factors<br>Affect The Process Of<br>Emergency Evacuation. |
| <b>C</b> | Shin (41),<br>2021    | Korea     | Retrospective<br>Study | Descriptive         | 34* | Mitigation, Preparedness<br>, Response ,Recovery                                                                                                                                |
| <b>D</b> | Wood (40),<br>2021    | Iraq      | Review<br>Article      | Review              | 46  | Fire Safety And Hospital<br>Management, Fire Safety<br>Response, Emergency<br>Risk Management                                                                                   |



|          |                         |                |                          |                                                       |     |                                                                                                 |
|----------|-------------------------|----------------|--------------------------|-------------------------------------------------------|-----|-------------------------------------------------------------------------------------------------|
| <b>E</b> | Woyessa<br>(11), 2020   | Ethio<br>pia   | Original<br>Article      | Cross-<br>Sectional                                   | 32* | Planning, Committee,<br>Human Resource,<br>Logistics Finances,<br>Communication                 |
| <b>F</b> | Bazyar (12),<br>2020    | Iran           | Review<br>Article        | Systemat<br>ic<br>Review<br>With<br>Meta-<br>Analysis | 50* | Conducting Exercise,<br>Training Program, Proper<br>Management, Effective<br>Use Of Resources,  |
| <b>G</b> | Goniewicz<br>(13), 2020 | Polan<br>d     | Review<br>Article        | Retrospe<br>ctive<br>Analysis                         | 42  | Emergency Evacuation<br>Plan, Evacuation Drills,<br>Specific Responsibility,<br>Frequent Checks |
| <b>H</b> | Jang (14),<br>2020      | South<br>Korea | Retrospecti<br>ve study  | Retrospe<br>ctive<br>Data<br>Analysis                 | 7   | Triage, Full Utilization<br>Of Resources, Medical<br>Staff Safety                               |
| <b>I</b> | Farcas (15),<br>2020    | USA            | Model<br>Developme<br>nt | Model<br>Develop<br>ment                              | 17* | Communication,<br>Resource Use, Staff And<br>Patient Safety, And<br>Maintenance Of Roles        |

|          |                            |            |                     |                                                       |     |                                                                                            |
|----------|----------------------------|------------|---------------------|-------------------------------------------------------|-----|--------------------------------------------------------------------------------------------|
| <b>J</b> | Bhattacharya<br>(16), 2019 | India      | Original<br>Article | Intervent<br>ion<br>Study                             | 17  | Emergency Plan,<br>Disaster Committee And<br>Personnel                                     |
| <b>K</b> | Beyramijam<br>(17), 2019   | Iran       | Original<br>Article | Intervent<br>ion<br>Study                             | 27* | Planning, Triage,<br>Education, Space Usage,<br>Human Resource                             |
| <b>L</b> | Kazemzadeh<br>(18), 2019   | Iran       | Review<br>Article   | Systemat<br>ic<br>Review<br>With<br>Meta-<br>Analysis | 22  | Plan , Policy, Inadequate<br>Resources, Guidelines                                         |
| <b>M</b> | Wax (19),<br>2019          | Canad<br>a | Review<br>Article   | Review                                                | 24  | All Hazard Versus<br>Hazard Specific Plan,<br>Specific Roles,<br>Interprofessional Efforts |
| <b>N</b> | Lee (20),<br>2018          | China      | Original<br>Article | RCT                                                   | 37  | Training, Evacuation<br>Procedure, Fire Drills,<br>Self-Rescue, Patient<br>Evacuation      |

|          |                         |                     |                     |                     |    |                                                                                         |
|----------|-------------------------|---------------------|---------------------|---------------------|----|-----------------------------------------------------------------------------------------|
| <b>O</b> | Koka (21),<br>2018      | Tanza<br>nia        | Original<br>Article | Cross-<br>Sectional | 34 | Disaster Plan ,Training,<br>Triage, Communication<br>System , Human<br>Resource , Space |
| <b>P</b> | Shalhoub<br>(22) , 2017 | Saudi<br>Arabi<br>a | Original<br>Article | Cross-<br>Sectional | 16 | Disaster Plan,<br>Committee, Exercises<br>,Staff, Transport, Surge<br>Capacity          |
| <b>Q</b> | Tekin (23),<br>2017     | Turke<br>y          | Review<br>Article   | Review              | 29 | Communication, Role Of<br>Media, Humanitarian<br>Services, Triage,<br>Disaster Plan     |
| <b>R</b> | Lakbala (24),<br>2016   | Iran                | Original<br>Article | Cross-<br>Sectional | 18 | Limited Beds, Limited<br>Human Resource, Drills,<br>Training, Space                     |
| <b>S</b> | Paganini<br>(25), 2016  | Italy               | Original<br>Article | Cross-<br>Sectional | 29 | Preparedness , Training,<br>Triage ,Activate And<br>Deactivate Plan                     |
| <b>T</b> | Ingrassia<br>(26), 2016 | Italy               | Original<br>Article | Cross-<br>Sectional | 40 | Command System, Surge<br>Capacity, Simulations &<br>Drills , Recovery Plan              |

|          |                        |            |                     |                             |    |                                                                                                                 |
|----------|------------------------|------------|---------------------|-----------------------------|----|-----------------------------------------------------------------------------------------------------------------|
| <b>U</b> | Lofqvist (27),<br>2016 | Swed<br>en | Original<br>Article | Cross-<br>Sectional         | 18 | Written Plan, Education<br>& Training, Specific<br>Plans, Practice Over<br>Planning                             |
| <b>V</b> | Zhong (28),<br>2014    | China      | Original<br>Article | Cross-<br>Sectional         | 58 | Essential Services,<br>Cooperative System,<br>Incident Command<br>System, Specific Plan                         |
| <b>W</b> | Djalali (29),<br>2014  | Europ<br>e | Original<br>Article | Cross-<br>Sectional         | 19 | Education And Training,<br>All Hazard Approach,<br>Multisectoral Financing,<br>Collective Strategic Plan        |
| <b>X</b> | Talati (30),<br>2014   | India      | Manual              | Manual<br>Drafting          | 11 | Disaster Committee,<br>Mock Drills, Command<br>Centre, Training,<br>Communication, Family<br>And Media Handling |
| <b>Y</b> | Djalali (31),<br>2013  | Swed<br>en | Original<br>Article | Cross-<br>Sectional         | 38 | Contingency Plan,<br>Committee , Logistics,<br>Finances                                                         |
| <b>Z</b> | Femino (32),<br>2013   | USA        | Review<br>Article   | Retrospe<br>ctive<br>Review | 7  | Communication, Onsite<br>Triage, Drill, External<br>Partners                                                    |

---

|           |                              |                       |                     |                     |    |                                                                               |
|-----------|------------------------------|-----------------------|---------------------|---------------------|----|-------------------------------------------------------------------------------|
| <b>AA</b> | Sobhani (33),<br>2012        | Iran                  | Original<br>Article | Cross-<br>Sectional | 25 | Communication,<br>Logistics, Administration<br>, Infrastructure               |
| <b>AB</b> | Venkatasesha<br>n (34), 2011 | India                 | Review<br>Article   | Narrative<br>Review | 8  | Emergency Evacuation,<br>Fire Drill , Staff<br>Education, Space, Sign<br>Post |
| <b>AC</b> | Murphy (35),<br>2011         | United<br>Kingd<br>om | Original<br>Article | Cross-<br>Sectional | 15 | Unit Design, Equipment,<br>Planning, Training<br>Triage                       |

---

**\*references includes systematic review &/RCTs**

---

141

142 The collected data were analysed using critical interpretive analysis. At the outset, a review  
143 question was formulated with the scope of modification. Initially, one author (NP) read the  
144 entire text of each of the 29 articles that met the criteria. All of the codes and basic concepts  
145 linked to disaster preparedness aspects were retrieved for coding. Then they were examined  
146 line by line, numerous times, to get the beginning codes. Following that, the first two authors  
147 (RG, NP) compared and contrasted all the identified codes, and then grouped related codes into  
148 one category to generate a sub-theme.

### 149 ***2.5 Synthesis of argument***

150 The goal of the analysis was to provide a critically informed integration of information from  
151 all of the articles in the review. The synthesized argument was then linked to a pre-existing

152 structure, the WHO Hospital Safety Index Evaluation Form -Module 4 (38), to help formulate  
153 the major themes. Finally, all the researchers reviewed the summarised texts to generate new  
154 ideas, and the findings including the synthesized themes and subthemes were appropriately  
155 elucidated and mapped. Analysis was done in MS office 365, and graphical representation  
156 including geo-mapping was done using Tableau version 2021.4. Necessary modifications were  
157 made until everybody concurred on the final version.

### 158 3. Results:

159 To understand the geo-spatial prominence of selected studies in terms of disaster preparedness  
160 and its aspects, included studies were numbered and geo-mapped, and average scores for each  
161 country on the domain-wise emphasis were assessed on the Likert scale (no, moderate,  
162 prominent emphasis). Computed scores were added at a country level, a reverse red color  
163 gradient of which is reflected in the map with 10 (Dark red) being the lowest scores for  
164 Australia and 78 (Light red) being the heights average score for Ethiopia. (Figure 2)

### 165 **Figure 2: World map showing number of included studies from different countries and** 166 **country-wise gradient of average scores on disaster preparedness**

167 In this, each study was also evaluated based on core domains of disaster preparedness derived  
168 from the WHO Hospital Safety Index Evaluation Form. The evaluation was done by  
169 qualitatively analysing each article with a special focus on the authorial voice including  
170 typographical emphasis (Italics usage for keywords, stage cues, backstories, and capitalization)  
171 and contextual perspectives. The emphasis of each disaster preparedness domain in the  
172 individual study is mapped using a heat map with the color orange reflecting no emphasis  
173 (coded as 0), yellow with moderate emphasis( coded as 1), and green reflecting prominent  
174 emphasis (coded as 2) . Included studies presented on x axis with their code reference (A-AC)  
175 are mentioned in Table 2 and disaster preparedness domains are reflected on the right side in

176 tabular form. (Figure 3) . A study conducted in Ethiopia ticked most boxes (reflected in green)  
177 for prominent emphasis as it covered all key aspects of disaster preparedness prominently  
178 featuring in the background statement, study tools, discussion, and conclusion. (Figure 3)

179 **Figure 3: Heat map showing individual study focused emphasis on attributes of disaster**  
180 **preparedness in the included studies**

181 The magnitude of reasoned representation of key focused areas in included studies is illustrated  
182 through a word cloud. In this, the commonly repeated keywords and concepts from each study  
183 were compiled to understand the ictus and weightage of various disaster preparedness  
184 components. As it is reflected some of the key insistent words were

185 “ disaster plan”, “human resource”, “equipment and logistics”, “triage”, “drills and triage”, “  
186 command system”. ( Figure 4)

187 **Figure 4: Word cloud depicting reasoned and proportionate representation of key focus**  
188 **areas of the shortlisted studies irrespective of their geographical representation**

189 Based on the results obtained from the word cloud, and heat map the clarity of purpose and  
190 strategic priorities in various important domains and subdomains of disaster preparedness was  
191 jotted and themed and domain-wise emphasis scores were graded and computed, then the  
192 proportions were mapped as individual slices of nested pie diagram. As reflected, Human  
193 Resource, Coordination, Logistics And Finance, Response, Patient Care and Support,  
194 Communication, Evacuation, and Personal Protection emerged as major themes and among  
195 subthemes: staff availability, specified roles, evacuation plan, disaster response plan,  
196 exercise/drills, internal and external communication, local supplies were the prominent ones.  
197 (Figure 5)

198 **Figure 5: Nested pie showing domain specific emphasis of disaster preparedness in the**  
199 **included studies**

200       4. **Discussion:**

201   Hospital preparedness for disasters differs significantly from other area of disaster  
202   preparedness. Although papers detailing hospital disaster preparedness are common, most  
203   studies are incident-specific and they are unable to give a thoroughgoing insight into all the  
204   elements of the all-hazard disaster preparedness approach. Also, systematic reviews done on  
205   the topic quantified the evidence from individual studies leading to a telescopic perspective  
206   and have the potential to miss some key ideas and dynamics related to disaster preparedness.  
207   This study uses a novel qualitative interpretative synthesis to not only understand the hospital  
208   preparedness dynamic in the context of disaster but also help generate new insight making the  
209   scope of vision broader and thus helping understand the concept better. We here discuss key  
210   elements emphasized in the included studies.

211   ***Prioritizing intervention based on risk perception:***

212   A concept analysis conducted at the Griffith University of Australia emphasizes using a  
213   comprehensive solution-based strategy for the best possible service provisions in addition to  
214   addressing the needs for training, retraining, capacity building, and mock drills. The effect of  
215   changing modalities and processes of existing healthcare facilities requires scrutiny at all levels  
216   of needs and demands for making the facility friendly to a high influx of people struck by  
217   disaster. When one attribute is extended beyond normal operational capacities, the  
218   effectiveness and capacity of the other attributes will likely be limited. (39)

219   The safe functioning of electrical equipment prevents fire hazards through strategic  
220   preparedness for any accident, emergency, and unforeseen circumstances at various health  
221   care service facilities. The overall perspective hence should be focused upon consolidation and  
222   matching of risk perception, related factors, and assessment-based prioritized reforms cum  
223   rapid corrective actions. (40) The inverse proportion of single attribute preponderance with



224 other related attributes has been emphasized in a study guide to set up a balanced environment  
225 of facilities and manpower to address the overwhelming load for treatment care and support in  
226 situations of disaster occurrence with or without warning. (39)

227 In an exclusive study conducted in Gumi City, the Republic of Korea, the issues identified  
228 therein include conceptual clarity for preparedness, mitigation, response and rehabilitation, and  
229 reconstruction cyclically through detailed analysis of requirements in a hospital setting for  
230 minimizing the risk through assessment of manpower, skill, knowledge, experience, expertise,  
231 vulnerability, capacity, and inbuilt systems towards disaster response. There has been stress on  
232 the felt need of having an overall control network for cohesive actions by the administration,  
233 management, and facility (41)

234 ***Comprehensive planned response:***

235 The protocol development, amendment, and timely up-gradation for disaster management  
236 plans as per demographic needs requires sustained and sustainable inputs, efforts, and actions  
237 (25) A study conducted in Iran has categorically highlighted, evidence for considering the  
238 importance of an all-inclusive response consisting of preplanning, execution of a plan, and  
239 information dissemination through a systematic approach. The areas identified by the  
240 researchers include mobility, flexibility, resonance, interaction, speed, accuracy, awareness,  
241 respectability, positivism, and spirit of faith among service providers and beneficiaries. (42)

242 European countries have stretched upon evidence-based fulfilment of technical requirements  
243 to ensure safe, secure convenient, methodological appropriate, and cost-effective evacuation  
244 measures supported by a well-devised plan of action with pre-decided and pre-identified roles  
245 and responsibilities of various stakeholders using the resources available including but not  
246 limited to the aspects of feasibility, speed, and accuracy of evacuation exercises while using

247 interactive mechanisms of security among government organizations, Non-government  
248 agencies and service providers. (13)

249 Planning has been identified as the key driver of change as it reflects the policies and defines  
250 the directionality of guidelines and procedures to be adopted for adequate resource utilization  
251 and contingency plan based implementation of preventive processes under the umbrella cover  
252 of accreditation standards universally accepted for response to disasters in various departments  
253 of the hospitals. (18) Facility-based preparedness may not be in tune with the resource  
254 mobilization cum appropriate measures undertaken at the national level and it, therefore,  
255 necessitate the need for developing regional, local, and facility-specific plans under the  
256 umbrella cover of national health policies, priorities, and planned public health preferences.  
257 (26)

258 An actionable strategic plan helps in clarifying the readiness related to the operational plan,  
259 contingency plan, and resource plan in emergencies while considering the magnitude and  
260 strength of the expected hazards. The hospital disaster plan hence is dependent on the dual edge  
261 of the economy and dedicated planned inputs. (31) Planning is not only essential for getting  
262 the personnel educated and trained but also for ensuring methodical approaches towards the  
263 inclusion of micro-plans related to evacuation, triage, and communication. (32)

264 ***Prioritized and categorized qualitative:***

265 Development of the domain-specific surveillance system and establishment of resource  
266 strengthening measures aid in designing the comprehensive action plan for hospital disaster  
267 resilience. It should define and describe the role of emergency medicine response, staff  
268 capability, capacity building, communication systems, interventional plans, recovery and  
269 rehabilitation, logistics management, and standardized practices cum networking. The

270 categorization of disaster management-related supplies has also a pivotal role in addressing the  
271 basic needs of food transport medical supplies and preventive measures along with the  
272 availability of common medications. (28)

273 There is hence, a transformational requirement for the inclusion of thus identified capacity  
274 enhancement measures into policy and programmatic documents to enable the ready  
275 availability, uniformity, and methodical approach of these measures at the implementation  
276 levels in various health care facilities. (42)

277 The administrative, managerial, and technical collaboration between the gas industry and  
278 hospitals is essential for appropriately, justifiably, and efficiently merging the objectives of  
279 patient safety at levels of awareness of hazards, capacity building, communication, monitoring  
280 the equipment and their maintenance. (40)

281 Having established a web-based disaster response, and mitigation system with well-defined  
282 processes using available resources along with structural reforms for an easy, smooth and clear  
283 flow of information, communication, and operations will do wonders for logistically managed  
284 and research-supported mechanisms of operation for disaster preparedness. Given this, there  
285 has to be a resonating balance between the existing health system network and model-based  
286 command and control systems. (15)

287 It is also understood through various studies that setting up of an intrinsic web of interactive,  
288 mutually sportive, and vibrant communicative link will enable the sharing of preventive  
289 measures among the facilities, especially in isolated hospital disasters. However without the  
290 political will and visionary support of all stakeholders the visibility, preference, and outcome  
291 of the interventional public health design may be compromised or even paralyzed during the  
292 actual occurrence of disasters. Area demarcation, command and control, and recovery

293 mechanisms are to be defined assessed, monitored and evaluated on a regular predefined  
294 timeframe and set norms for such practices. (26)

295 Categorization of any hospital preparedness for various levels of disaster risk is found  
296 dependent majorly upon human resources. It has been found that there may be a mismatch of  
297 risk perceptions by the administration and the actual scenario at facilities, and hence there is  
298 underlined the categorical need for a comprehensive interventional setup supported by regular  
299 assessment, monitoring, and evaluation. (11) The emphasized areas generally include  
300 evacuation preferences, communication, logistics, human resources, commanding, and  
301 management. It is a common phenomenon observed during the disaster to have a surge in the  
302 affected population, making facilities insufficient to cater for the requirements to be addressed  
303 as per globally set standards for indicators of health facility preparedness. (12)

304 Multisectoral, multidimensional, multifunctional, and multiple team-based designs of disaster  
305 prevention and vulnerability reduction exercises enable the hospitals to address the hazard,  
306 area, and mechanism-specific stakeholder participation through disaster exercises distributed  
307 among various subunits of the hospital systems inclusive of diagnosis, treatment, care, and  
308 support. (19)

### 309 ***Health system strengthening:***

310 Preparedness of the hospitals averts the deaths and prevents complications among the survivors  
311 as the risks are minimized through effective interventions of vital health care services. There  
312 is, however, a thin line of demarcation between structural and non-structural safety as both of  
313 these overlap each other's objectives. (12)

314 A participatory approach for devising, defining, and developing the comprehensive list of  
315 responsibility distribution, disaster manual development, and greater in-depth understanding at

316 all levels of health care functionalities ensures adequacy in resources capabilities and  
317 preparedness for minimizing the risks, threats, and vulnerabilities related to hospital disasters.  
318 (30) Incident command systems equipped with modern gadgets like CCTV and cameras help  
319 ensure effective administrative managerial and communication systems. These also guide for  
320 assessing the training needs of individuals and groups as per their area wise interventional  
321 requirements. (33)

### 322 ***Decision tree approach based tools***

323 Detailed analysis of situations, existing policies, structure, equipment, command system,  
324 planning, and monitoring based systems are the need of the hour for adequate, appropriate and  
325 effective alignment of priorities in line with the available resources motivational status of  
326 implementors, and defined networks of response. (35)

327 Strengthening of health systems depends primarily on the capacity of facilities service  
328 providers and mechanisms for strengthening the training status in an ongoing updated manner  
329 to ensure optimal gains in assurance for disaster preparedness. (29) The analysis of strengths,  
330 weaknesses, opportunities and the threat of disaster risk based on improvement requirements  
331 for hospital readiness are extensively analysed for improvement in the action plans and  
332 programs of disaster management. The internal weakness identified in studies has been a lack  
333 of exit signs, and a weak telecommunication system whereas the strengthening factors have  
334 been trained manpower, travel support mechanisms, and improvement in the infrastructure of  
335 the hospital. The opportunities for improvement are immense including facilities for shifting,  
336 emergency support for health care, and spaces for the affected population, whereas population  
337 density and disaster-prone houses are threats during the disaster. (24)

338 The training of health care workers especially those involved in those areas having  
339 vulnerability to fire hazards have been recommended using awareness sessions generated  
340 enhanced knowledge and action-based for expected readiness of quick response to have  
341 effective actions towards fire prevention, rescue and evacuation exercises. (20)

342 Hospital disaster preparedness depends not only upon the sharing of the information, awareness  
343 generation, and technical capabilities but also depends on the training, re-training, disaster  
344 drills, research, and adherence to the emergency disaster plans. (22)

345 It has been underlined that the capacity building for disaster preparedness, management, and  
346 administrative infrastructural support shall go a long way in establishing a self-sustainable  
347 model for the action-oriented, automated, and competent response to hospital disasters of  
348 varied nature as evidenced during the mass casualties and distribution of workloads of  
349 frontline divisions of critical care facilities. (25)

350 The deficiencies identified in addressing disasters include non-translation of written protocols  
351 into practice, in coordination among the various agencies, capacity building lapses, and non-  
352 observance of repeated practical sessions and surprise alarm system based check exercises for  
353 emergency evacuation, saving lives, shifting patients, and hassle-free transit systems. (27)

354 Detailed decision trees have been charted for the evacuation and its triage with a support system  
355 through field hospitals providing emergency medical, humanitarian, and logistics facilities.(23)

356 Triage providers without any formal training may be influenced by mass casualties and  
357 therefore biased support to select individuals or groups belonging to influential classes  
358 although not falling in the priority list of triage categorization. It, therefore, necessitates the  
359 emphasis on in-depth understanding, training, and assistance of reliable communication  
360 networks with tools, systems, and warning mechanisms in place. (21)

361

362 Triage has been identified as a key instrument during disasters of various nature affecting  
363 countries. The classification of triage into categories of severe mild and dead with their  
364 respective color coding and related prioritization cum transportation with an inherent limitation  
365 for follow-up of casualties on a long-term basis, it becomes difficult to assess the outcome of  
366 mass casualty and to understate the effect of preventive interventions in place for medical  
367 assistance. (14)

368 Development and implementation of established, modern, and new tools for prevention and  
369 control of hospital disasters include careful observance of well-displayed evacuation routes,  
370 evacuation areas, and related medical care facilities with equal emphasis on training of all  
371 identified personnel.(34) Operational research is required for the assessment of interventional  
372 requirements so as to develop specific need-based interventions with assisted audio-visual  
373 support through mock drills, seminars, and educational interventional packages. (16)

374 The use of the ‘Hospital Emergency Response Checklist’ is found to be very useful for policy  
375 development, decision-making regarding response plans, training at various levels, and  
376 reaching conclusions based on the results obtained through risk and hazard assessment. There  
377 is a need to conduct studies related to a multidimensional assessment of the effect of the  
378 intervention, especially in the hospitals identified previously as having a low level of disaster  
379 preparedness. (17)

### 380 **Strength and Limitations :**

381 This research comprehensively reviewed, analysed, and discussed all possible facets of disaster  
382 preparedness using a fairly unprecedented qualitative approach that adds strength to the  
383 research. The review search includes articles published in the English language, and those

384 indexed in PubMed, Google Scholar, and some key selected journals on disaster management,  
385 so articles from other databases (including grey literature), and studies from different languages  
386 on disaster preparedness could have been potentially missed. To overcome this issue, we used  
387 a robust and exhaustive search syntax, with the provision of all possible synonyms of  
388 keywords, in PubMed, allowing initial screening of the vast majority of articles.

389

390 **Conclusion :**

391 The present study concludes that multisectoral initiatives are key to the formulation of  
392 successful hospital disaster preparedness. Monitoring of this preparedness plan includes all  
393 important ingredients related to governance, logistics, program management specific need-  
394 based arrangements, use of new tools, efficient communication systems, modernization of  
395 health care facilities, and well-defined triage systems in place.

396 **Future scope:**

397 This study can act as a guiding paper for the policy makers and program managers not only to  
398 recognize the key focused areas in disaster resilience but also to understand the dynamics of  
399 disaster management, helping them adapt to the emerging needs of hospital disaster  
400 preparedness. The ideas generated in the present study, mark a stepping stone in the  
401 directionality of developing a comprehensive, all-inclusive disaster resilience framework and  
402 formulation of universal tool of intervention in future for different geo-social settings.

403 **Ethical considerations :** Ethical issues (Including plagiarism, misconduct, data fabrication  
404 and/or falsification, double publication and/or submission, redundancy, etc.) have been  
405 completely observed by the primary author.

406



407 **References:**

- 408 1. United Nations. Disaster | UNDRR [Internet]. [cited 2022 Mar 22]. Available from:  
409 <https://www.undrr.org/terminology/disaster>  
410
- 411 2. Isfahani M, Davari F, Azizkhani R, Rezvani M. Decreased Emergency Department  
412 Overcrowding by Discharge Lounge: A Computer Simulation Study. *Int J Prev Med.*  
413 2020;11(1):13. PMID: 32175053  
414
- 415 3. Kazemzadeh M, Shafiei E, Jahangiri K, Yousefi K, Sahebi A. The Preparedness of  
416 Hospital Emergency Departments for Responding to Disasters in Iran; a Systematic  
417 Review and Meta-Analysis. *Arch Acad Emerg Med.* 2019;7(1):e58.PMID:  
418 31875212  
419
- 420 4. Sandra K, Meital N, Ofer M, Limor AD, Sara G. Facilitating emergency hospital  
421 evacuation through uniform discharge criteria. *Am J Emerg Med.* 2017;35(5):681–  
422 4. PMID: 28153680  
423
- 424 5. Rezaei F, Mohebbi-Dehnavi Z. Evaluation of the readiness of hospitals affiliated to  
425 Isfahan University of Medical Sciences in unexpected events in 2017. *J Edu Health*  
426 *Promot.* 2019;8(1):14. PMID: 30815485  
427
- 428 6. Jahangiri K, Rostami N, Sahebi A. Challenges of Utilizing the Primary Health Safety  
429 Index Tool for Assessing the Vulnerability of Healthcare Centers to Disasters. *Adv*  
430 *J Emerg Med.* 2020;4(1):e1. PMID: 31938770  
431

- 432 7. Afkar A, Mehrabian F, Shams M, Najafi L. Assessment of the Preparedness Level  
433 of Administrators and State Hospitals of Guilan against Earthquake.2013;10(2s):60-  
434 6  
435
- 436 8. Iserson K v. Vertical hospital evacuations: a new method. South Med J. 2013  
437 ;106(1):37–42. PMID :23263312  
438
- 439 9. World Health Organization. Strategic Framework for Emergency  
440 Preparedness.Apps.Who.int.2022. Available from:  
441 [https://apps.who.int/iris/bitstream/handle/10665/254883/9789241511827eng.pdf;js](https://apps.who.int/iris/bitstream/handle/10665/254883/9789241511827eng.pdf;jsessionid=5AEC8935E8BA9EBB25C485AB42A7F319?sequence=1)  
442 [essionid=5AEC8935E8BA9EBB25C485AB42A7F319?sequence=1](https://apps.who.int/iris/bitstream/handle/10665/254883/9789241511827eng.pdf;jsessionid=5AEC8935E8BA9EBB25C485AB42A7F319?sequence=1)  
443
- 444 10. Sendai Framework | NDMA, GoI [Internet]. [cited 2022 Mar 23]. Available from:  
445 <https://ndma.gov.in/Global/sendai-framework>  
446
- 447 11. Woyessa AH, Teshome M, Mulatu B, Abadiga M, Hiko N, Kebede B. Disaster  
448 Preparedness in Selected Hospitals of Western Ethiopia and Risk Perceptions of  
449 Their Authorities. Open Access Emerg Med.2020 ;12:219–25. PMID: 33116957  
450
- 451 12. Bazayar J, Pourvakhshoori N, Safarpour H, Far-Rokhi M, Khankeh HR, Daliri S, et  
452 al. Hospital Disaster Preparedness in Iran: A Systematic Review and Meta-Analysis.  
453 Iran J Public Health. 2020 May;49(5):837. PMID: 32953672  
454

- 455 13. Goniewicz K, Misztal-okońska P, Pawłowski W, Burkle FM, Czerski R, Hertelendy  
456 AJ, et al. Evacuation from Healthcare Facilities in Poland: Legal Preparedness and  
457 Preparation. *Int J of Environ Res Public Health*. 2020;17(5):1779. PMID: 32182947  
458
- 459 14. Jang JH, Cho JS, Lim YS, Hyun SY, Woo JH, Choi WS, et al. Disaster Response to  
460 a Mass Casualty Incident in a Hospital Fire by Regional Disaster Medical Assistance  
461 Team: Characteristics of Hospital Fire. *Disaster Med Public Health Prep* 2020;1-4.  
462 PMID: 32843109  
463
- 464 15. Farcas A, Ko J, Chan J, Malik S, Nono L, Chiampas G. Use of Incident Command  
465 System for Disaster Preparedness: A Model for an Emergency Department COVID-  
466 19 Response. *Disaster Med Public Health Prep*.2021;15(3):e31–6. PMID: 32576330  
467
- 468 16. Bhattacharya S, Singh A, Semwal J, Marzo R, Sharma N, Goyal M, et al. Impact of  
469 a training program on disaster preparedness among paramedic students of a tertiary  
470 care hospital of North India: A single-group, before–after intervention study. *J Educ  
471 Health Promot*.2020;9(1):5. PMID: 32154300  
472
- 473 17. Beyramijam M, Rasouli-Ghahfarokhi S, Fathollahzadeh A, Rahimzadeh A,  
474 Shahabirabori M, Aminizadeh M. The effect of education and implementation of  
475 “National Hospital Disaster Preparedness Plan” on an Iranian hospital preparedness:  
476 An interventional study. *J Educ Health Promot*. 2019;8(1). PMID: 31867379  
477

- 478 18. Kazemzadeh M, Shafiei E, Jahangiri K, Yousefi K, Sahebi A. The Preparedness of  
479 Hospital Emergency Departments for Responding to Disasters in Iran; a Systematic  
480 Review and Meta-Analysis. Arch Acad Emerg Med.2019;7(1):58. PMID:31875212  
481
- 482 19. Wax RS. Preparing the Intensive Care Unit for Disaster. Crit care clin.  
483 2019;35(4):551–62. PMID: 31445604  
484
- 485 20. Lee PH, Fu B, Cai W, Chen J, Yuan Z, Zhang L, et al. The effectiveness of an on-  
486 line training program for improving knowledge of fire prevention and evacuation of  
487 healthcare workers: A randomized controlled trial. PLoS One. 2018;13(7). PMID:  
488 29975723  
489
- 490 21. Koka PM, Sawe HR, Mbaya KR, Kilindimo SS, Mfinanga JA, Mwafongo VG, et al.  
491 Disaster preparedness and response capacity of regional hospitals in Tanzania: A  
492 descriptive cross-sectional study. BMC Health Serv Res. 2018;18(1):1–7. PMID:  
493 30400927  
494
- 495 22. Bin Shalhoub AA, Khan AA, Alaska YA. Evaluation of disaster preparedness for  
496 mass casualty incidents in private hospitals in Central Saudi Arabia. Saudi Med J.  
497 2017;38(3):302-6. PMID: 28251227  
498
- 499 23. Tekin E, Bayramoglu A, Uzkeser M, Cakir Z. Evacuation of Hospitals during  
500 Disaster, Establishment of a Field Hospital, and Communication. Eurasian J Med.  
501 2017;49(2):137-41. PMID: 28638258  
502

- 503 24. Lakbala P. Hospital Workers Disaster Management and Hospital Nonstructural: A  
504 Study in Bandar Abbas, Iran. *Glob J Health Sci.* 2015;8(4):221-6. PMID: 26573039  
505
- 506 25. Paganini M, Borrelli F, Cattani J, Ragazzoni L, Djalali A, Carenzo L, et al.  
507 Assessment of disaster preparedness among emergency departments in Italian  
508 hospitals: A cautious warning for disaster risk reduction and management capacity.  
509 *Scand J Trauma Resusc Emerg Med.* 2016;24(1):1–8. PMID : 27526719  
510
- 511 26. Ingrassia PL, Mangini M, Azzaretto M, Ciaramitaro I, Costa L, Burkle FM Jr, Della  
512 Corte F, Djalali A. Hospital Disaster Preparedness in Italy: a preliminary study  
513 utilizing the World Health Organization Hospital Emergency Response Evaluation  
514 Toolkit. *Minerva Anesthesiol.* 2016 Dec;82(12):1259-66. PMID: 27270072  
515
- 516 27. Löfqvist E, Oskarsson A, Brändström H, Vuorio A, Haney M. Evacuation  
517 Preparedness in the Event of Fire in Intensive Care Units in Sweden: More is  
518 Needed. *Prehosp Disaster Med.* 2017;32(3):317–20. PMID: 28279230  
519
- 520 28. Zhong S, Clark M, Hou XY, Zang Y, Fitzgerald G. Validation of a framework for  
521 measuring hospital disaster resilience using factor analysis. *International journal of  
522 environmental research and public health.* 2014[cited 2022 Feb 25];11(6):6335–53.  
523 PMID: 24945190  
524
- 525 29. Djalali A, Corte F della, Foletti M, Ragazzoni L, Gallardo AR, Lupescu O, et al. Art  
526 of Disaster Preparedness in European Union: a Survey on the Health Systems. *PLoS  
527 Curr.* 2014;6. PMID: 25685628

528

529 30. Talati S, Bhatia P, Kumar A, Gupta AK, Ojha ColD. Strategic planning and  
530 designing of a hospital disaster manual in a tertiary care, teaching, research and  
531 referral institute in India. World J Emerg Med. 2014;5(1):35. PMID : 25215145

532

533 31. Djalali A, Castren M, Khankeh H, Gryth D, Radestad M, Ohlen G, et al. Hospital  
534 disaster preparedness as measured by functional capacity: a comparison between  
535 Iran and Sweden. Prehosp Disaster Med. 2013;28(5):1–8. PMID: 23962358

536

537 32. Femino M, Young S, Smith VC. Hospital-based emergency preparedness:  
538 Evacuation of the neonatal intensive care unit - The smallest and most vulnerable  
539 population. Pediatric Emergency Care. 2013 Jan;29(1):107–13. PMID: 23283279

540

541 33. Sobhani G, Khammarnia M, Hayati R, Ravangard R, Heydari AR, Heydarvand S.  
542 Introduction Investigation of the preparedness level of the hospitals against disasters  
543 in Bandar Abbas, Iran, in 2012. J Pak Med Assoc. 2014;64(5):506-9. PMID:  
544 25272533

545

546 34. Venkataseshan J, Pandit S, Saini A. Fire accidents in neonatal nursery: prevention  
547 and management. Indian J Pediatr. 2011;78(11):1404–6. PMID: 21768077

548

549 35. Murphy GRF, Foot C. ICU fire evacuation preparedness in London: A cross-  
550 sectional study. Br Journal Anaesth. 2011;106(5):695–8. PMID: 21414979

551

- 552 36. Woods MD. Critical interpretive synthesis: what it is and why it is needed |  
553 Colloquium Abstracts [Internet]. Available from:  
554 [https://abstracts.cochrane.org/2006-dublin/critical-interpretive-synthesis-what-it-](https://abstracts.cochrane.org/2006-dublin/critical-interpretive-synthesis-what-it-and-why-it-needed)  
555 [and-why-it-needed](https://abstracts.cochrane.org/2006-dublin/critical-interpretive-synthesis-what-it-and-why-it-needed)  
556
- 557 37. Page MJ, Mckenzie JE, Bossuyt PM, Boutron I, Hoffmann TC, Mulrow CD, et al.  
558 The PRISMA 2020 statement: an updated guideline for reporting systematic  
559 reviews. [cited 2022 Feb 6]; Available from: <http://dx.doi.org/10.1136/bmj.n71>  
560
- 561 38. World Health Organization. Hospital Safety Index Hospital Safety Index  
562 Evaluation Forms WHO Library Cataloguing-in-Publication Data Hospital safety  
563 index: guide for evaluators-2nd ed. 2 v. Content: Guide for evaluators-Booklet of  
564 evaluation forms.Who.int.2022. Available from:  
565 [Who.int/hac/techguidance/preparedness/hospital\\_safety\\_index\\_forms.pdf?ua=1](http://Who.int/hac/techguidance/preparedness/hospital_safety_index_forms.pdf?ua=1)  
566
- 567 39. Sellers D, Crilly J, Ranse J. Disaster preparedness: A concept analysis and its  
568 application to the intensive care unit. *Aus Crit Care* .2022;35(2):204-9. PMID :  
569 34024715  
570
- 571 40. Wood MH, Hailwood M, Koutelos K. Reducing the risk of oxygen-related fires and  
572 explosions in hospitals treating Covid-19 patients. *Process Saf Environ*  
573 *Prot.*2021;153:278–88. PMID : 34188364  
574

- 575 41. Shin H, Oh SK, Lee HY, Chung H, Yoon SY, Choi SY, et al. Lessons learned from  
576 reviewing a hospital's disaster response to the hydrofluoric acid leak in Gumi city in  
577 2012. BMC Emergency Medicine. 2021;21(1):1–12. PMID : 33752618  
578
- 579 42. Sahebi A, Jahangiri K, Alibabaei A, Khorasani-Zavareh D. Factors affecting  
580 emergency evacuation of Iranian hospitals in fire: A qualitative study. J Educ Health  
581 Promot. 2021;10:154. PMID : 34222529



## Identification of studies via databases (PUBMED)

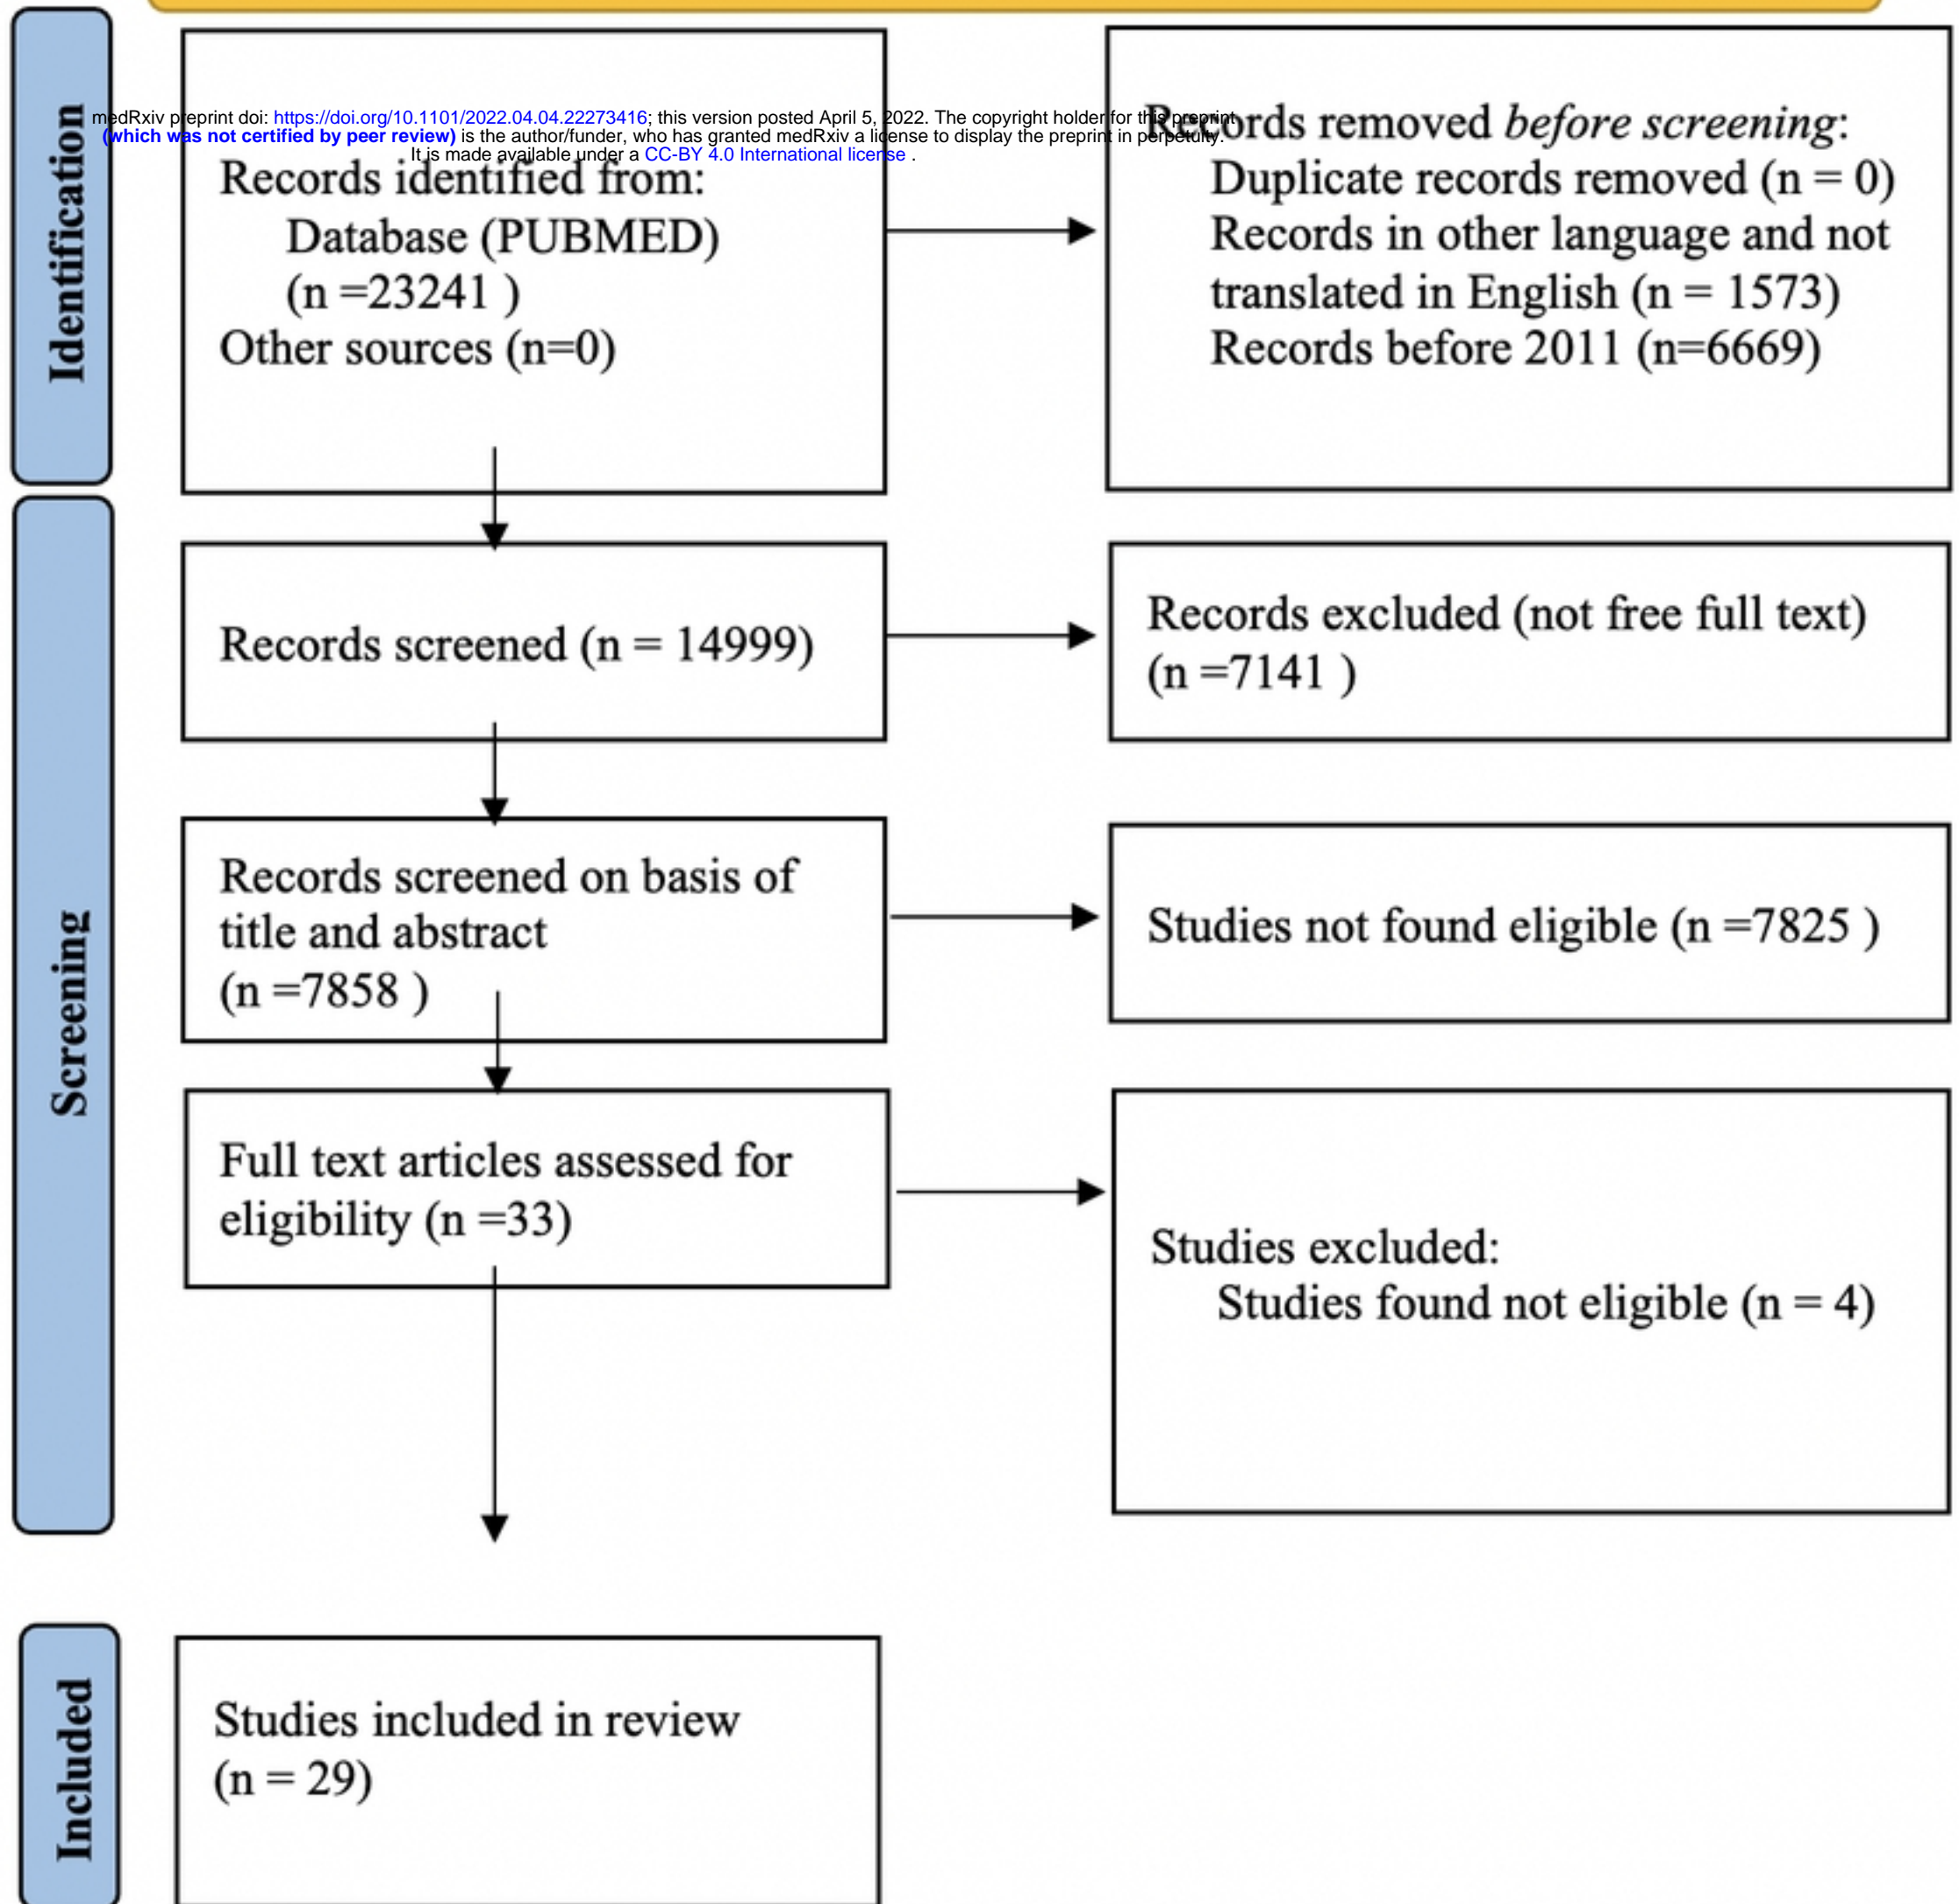

Figure 1

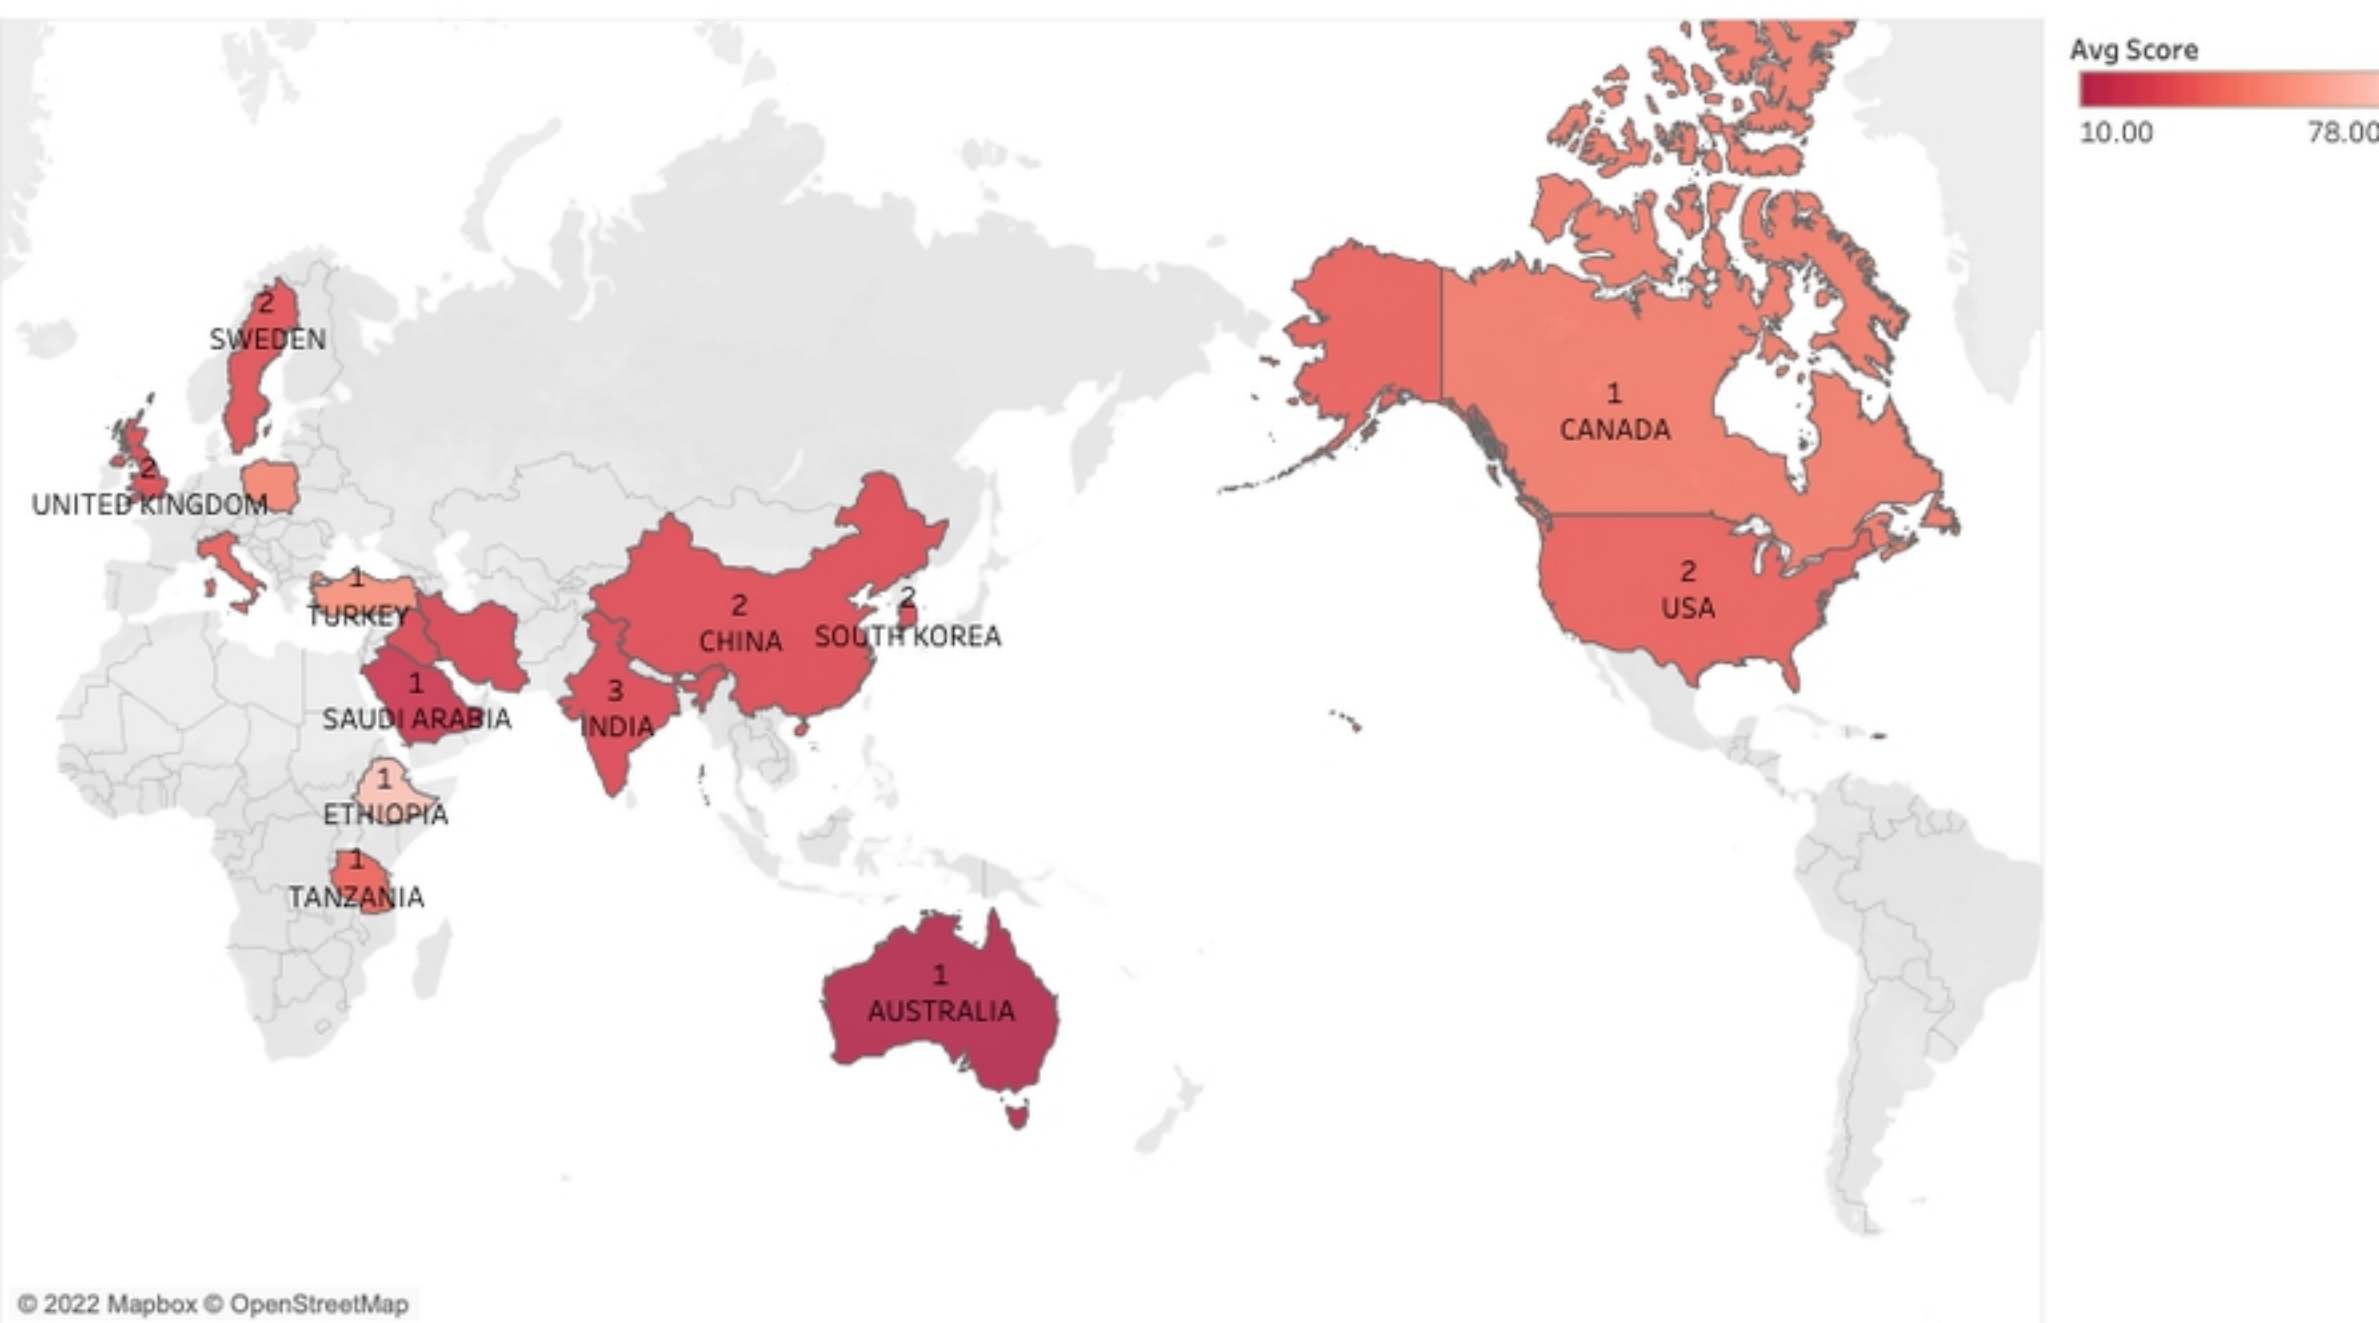

Map based on Longitude (generated) and Latitude (generated). Color shows sum of Avg Score. The marks are labeled by sum of Studies and Place. Details are shown for Place.

Figure 2

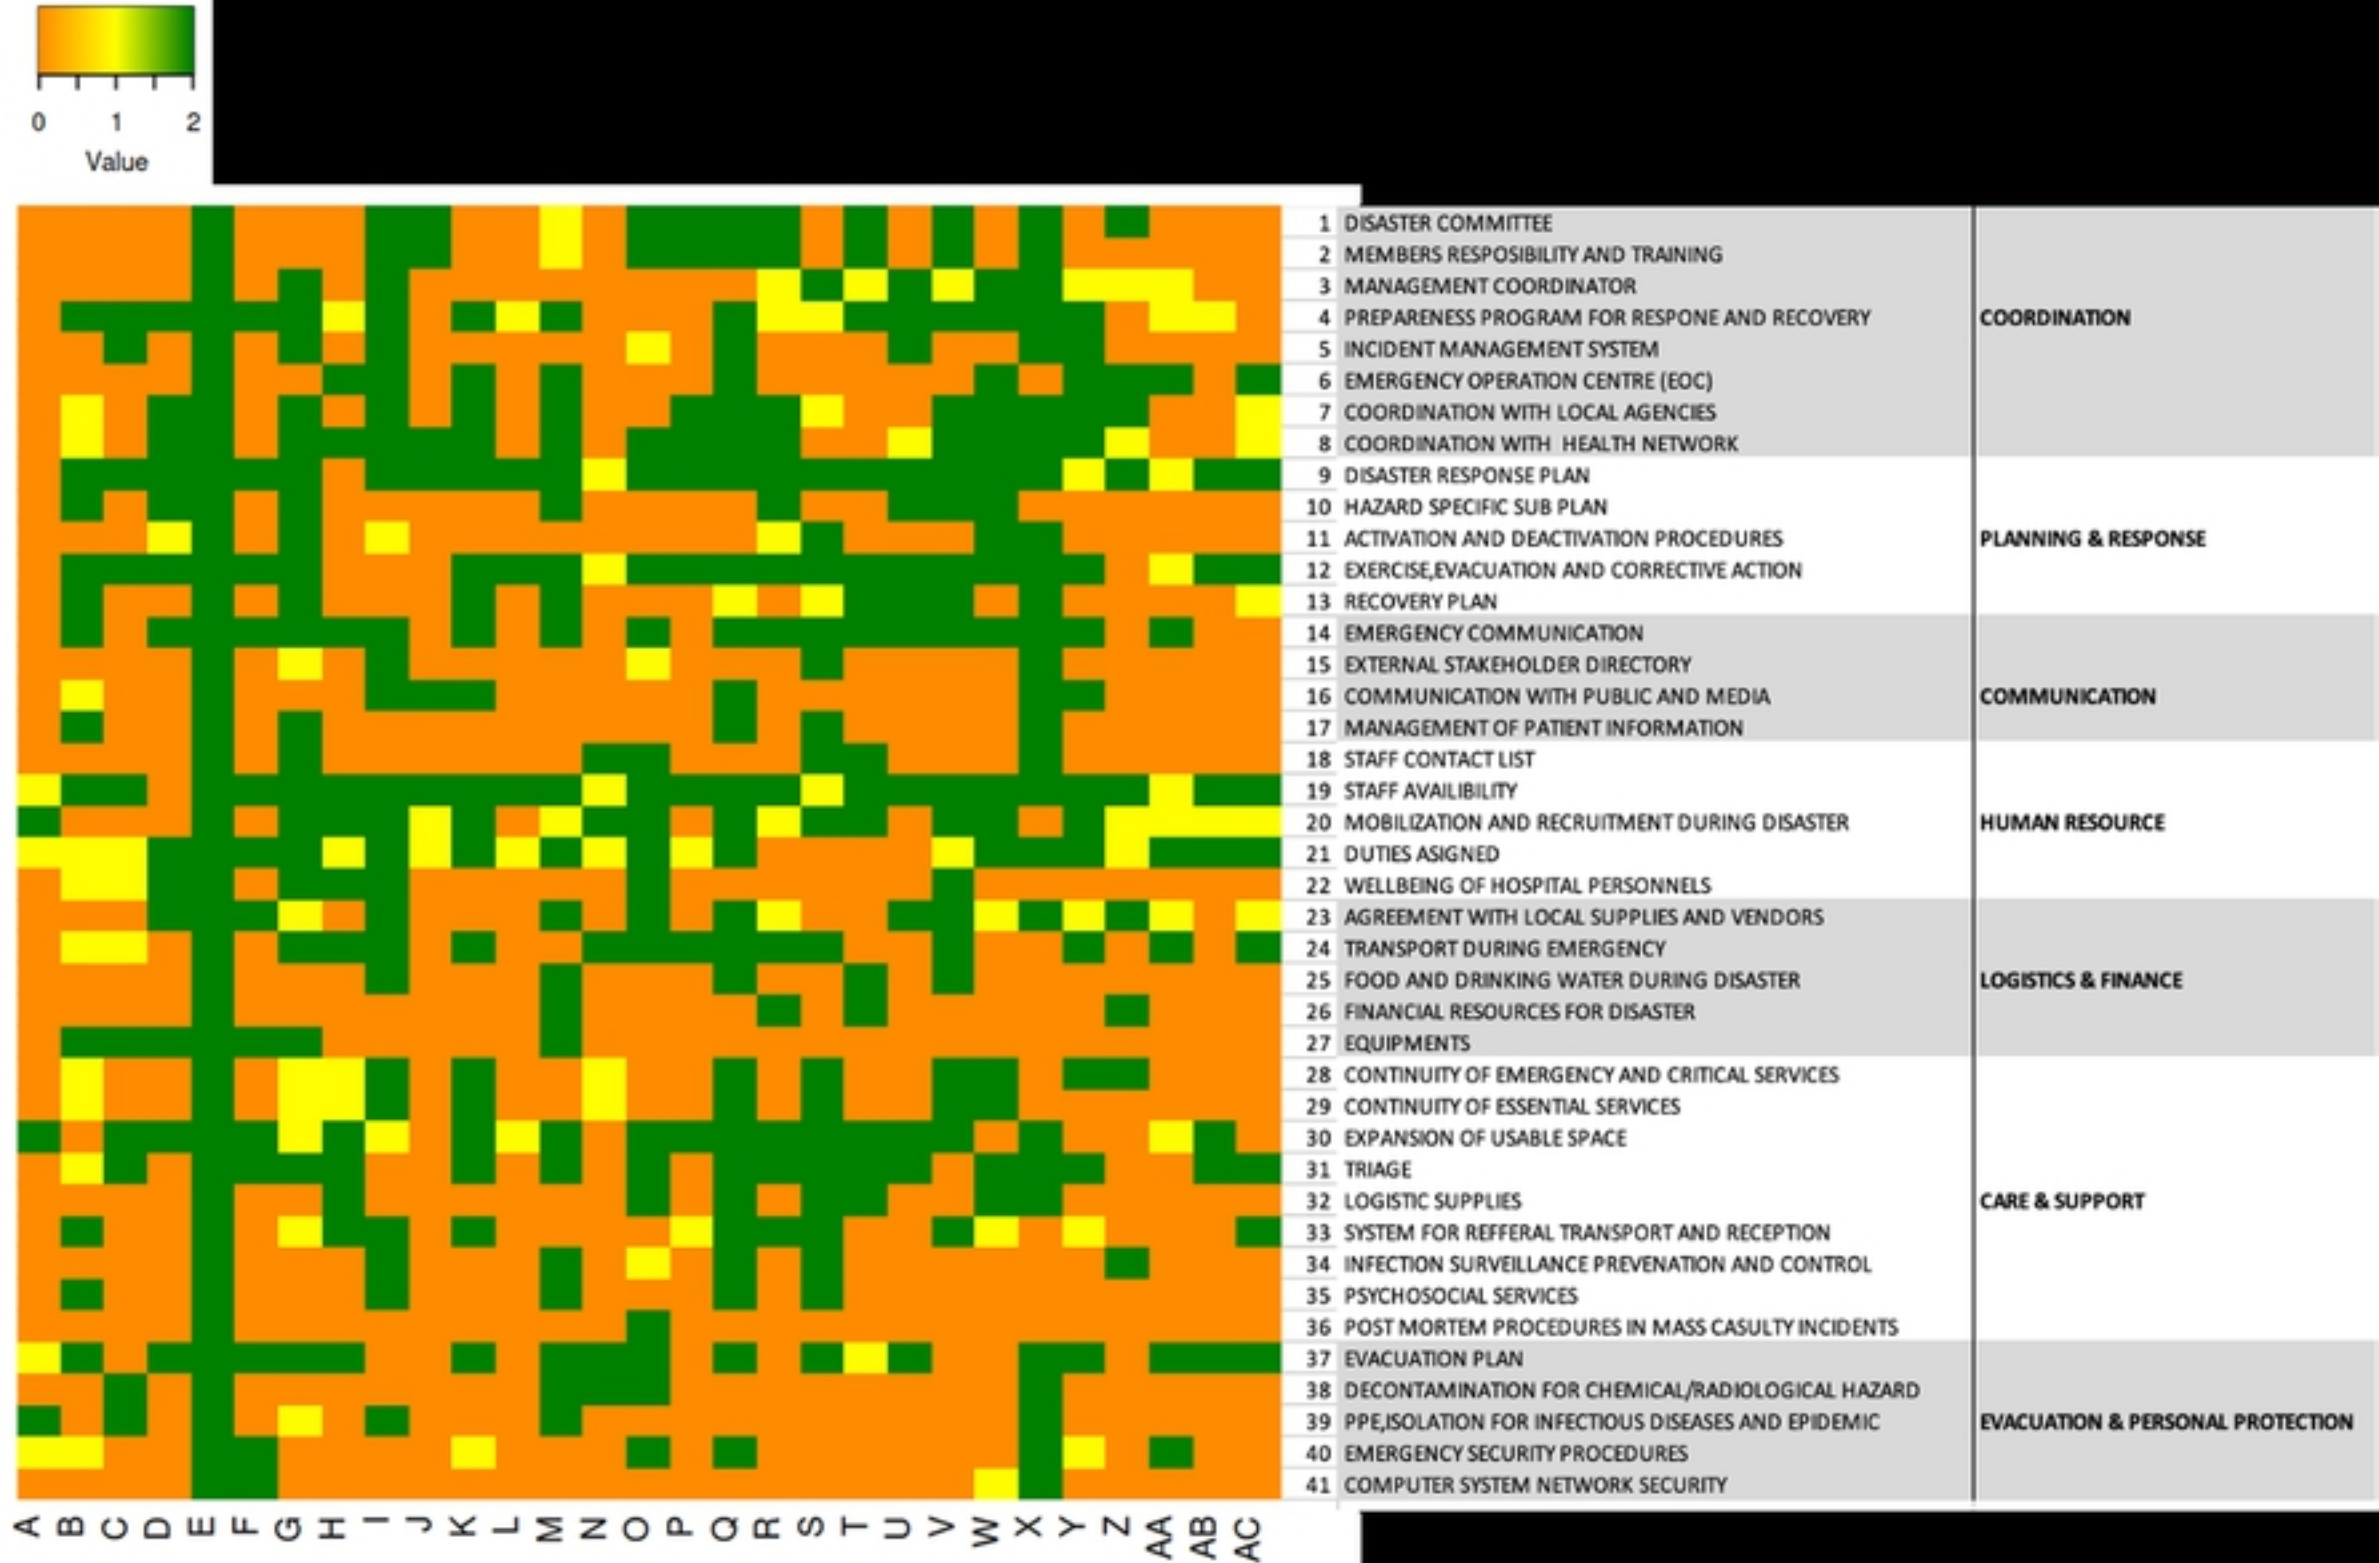

Figure 3





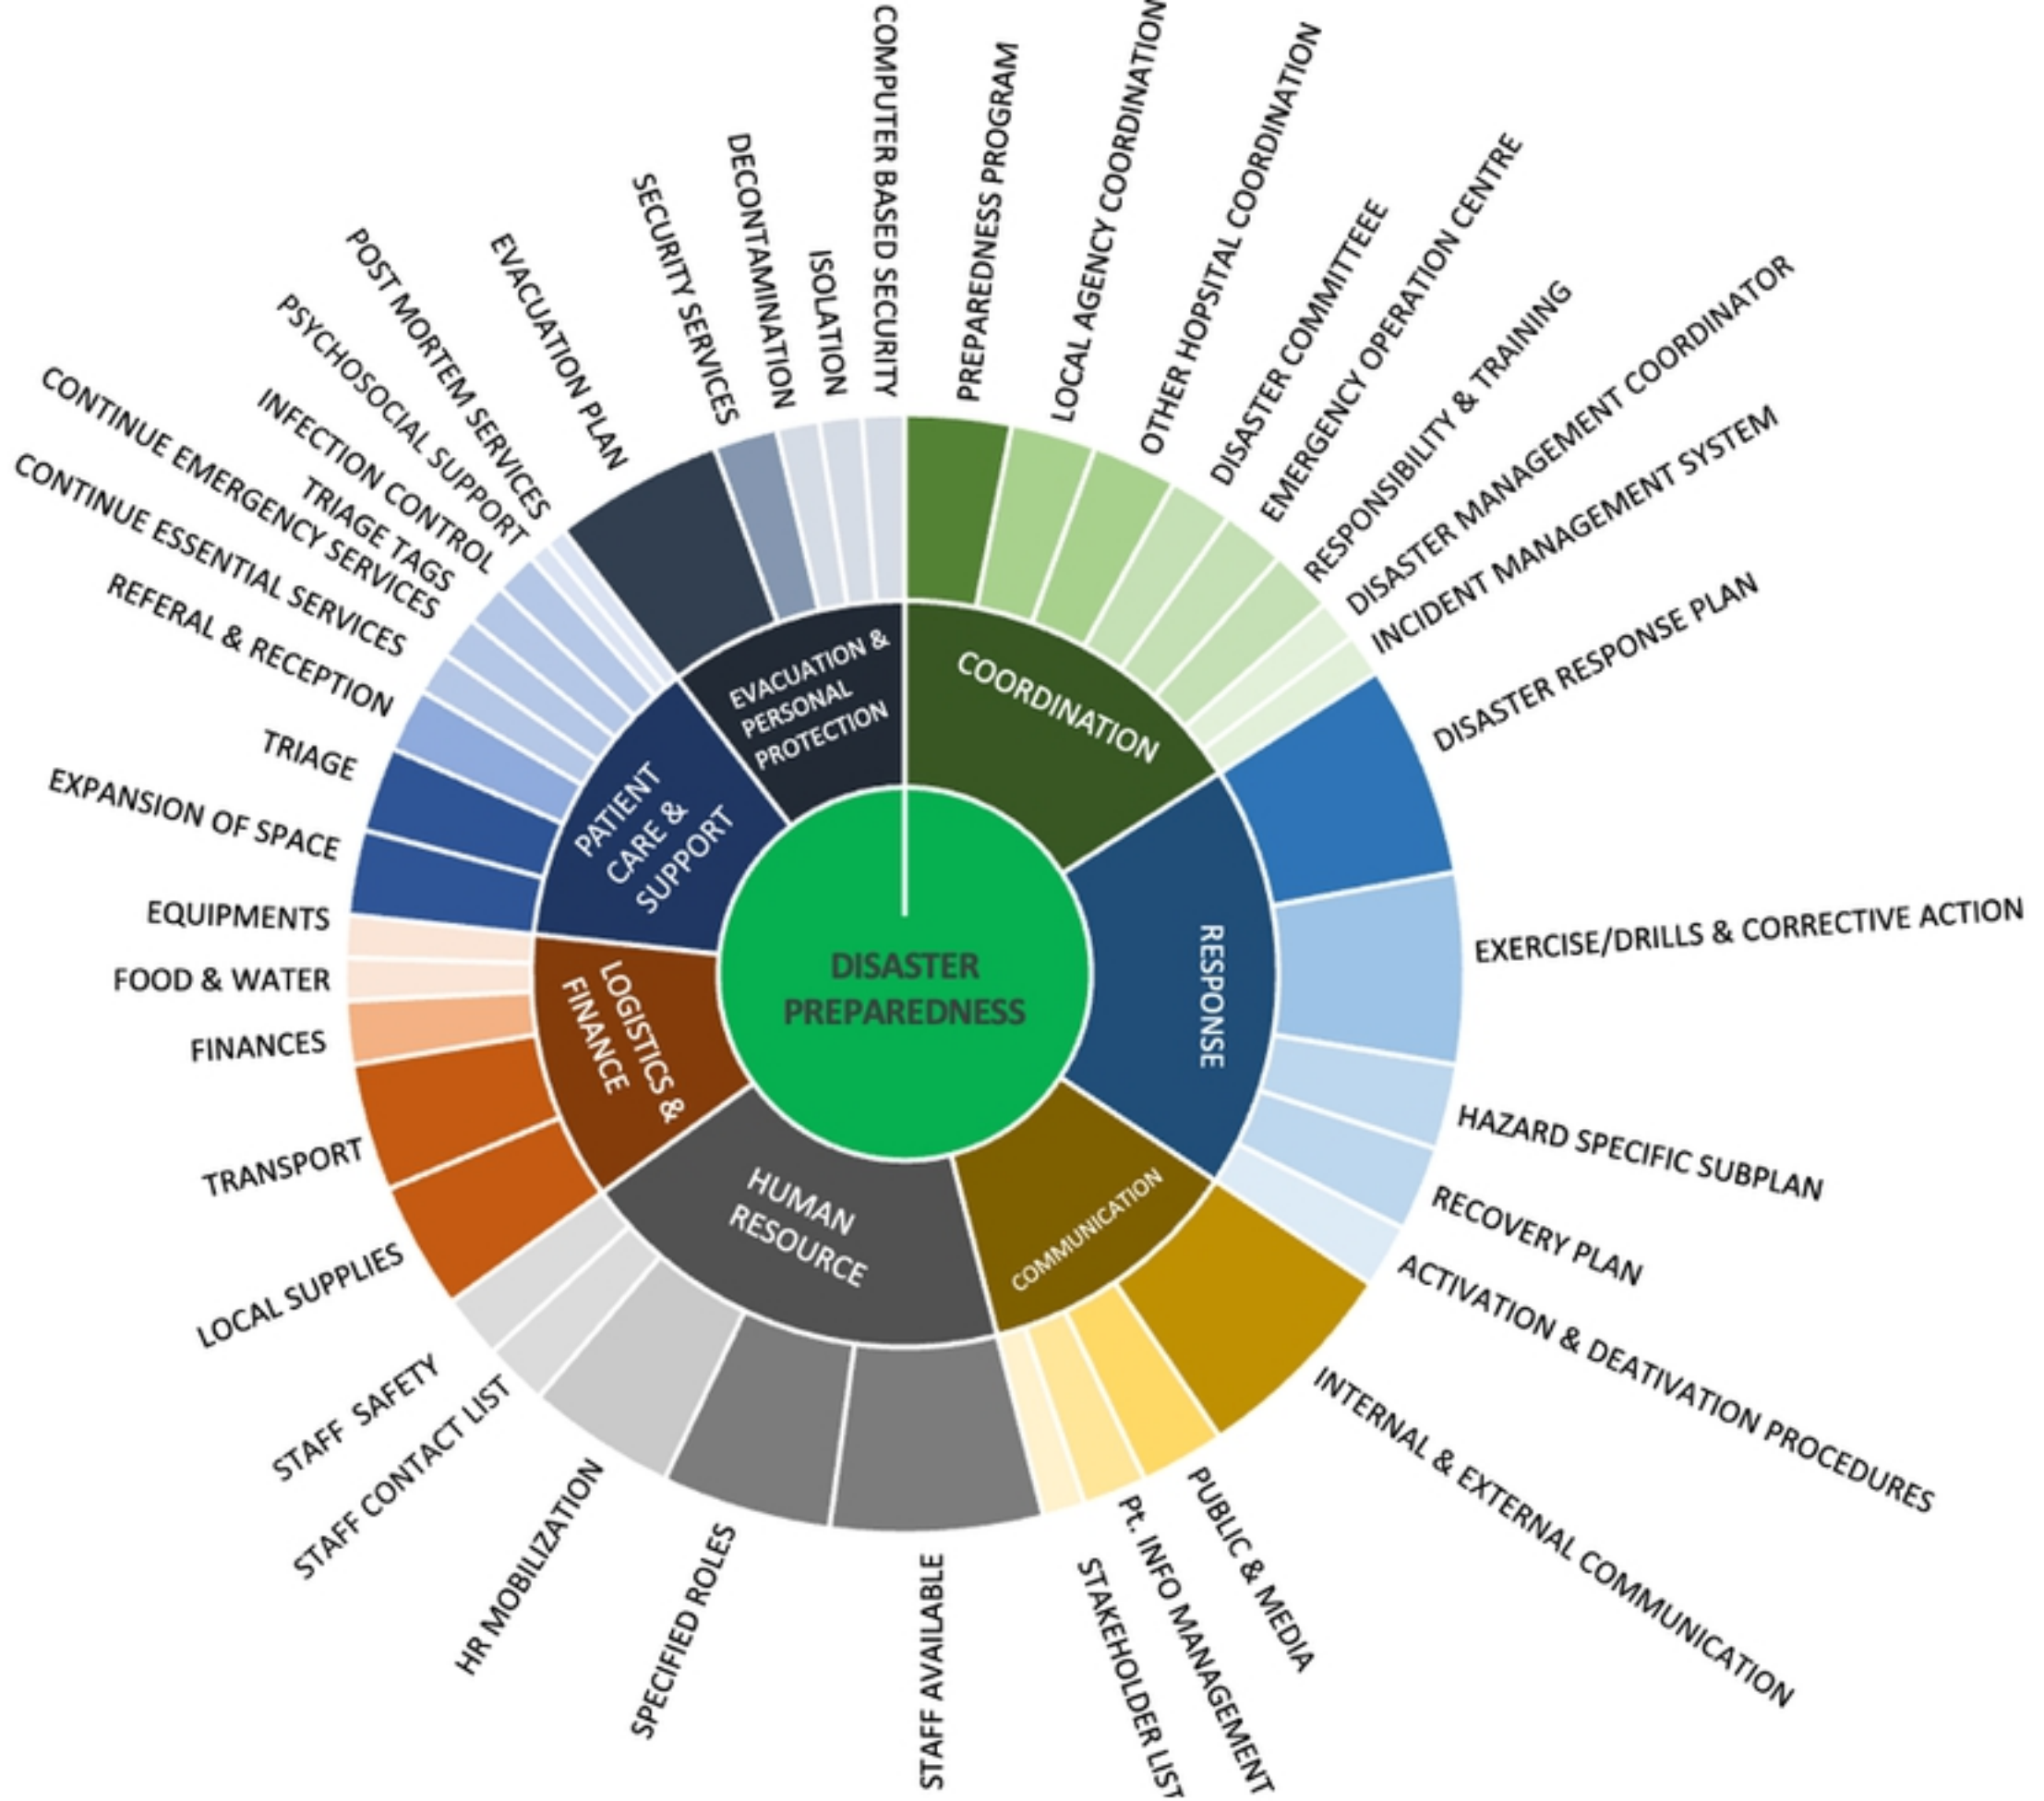

Figure 5
